# Supplementary material
Source: PubMed Central journal article supplement (PMC2990142)
Supplement: supp_tpc.110.077958_Supplemental_data_Lee_Facchini_final.pdf [file supp_tpc.110.077958_Supplemental_data_Lee_Facchini_final.pdf]

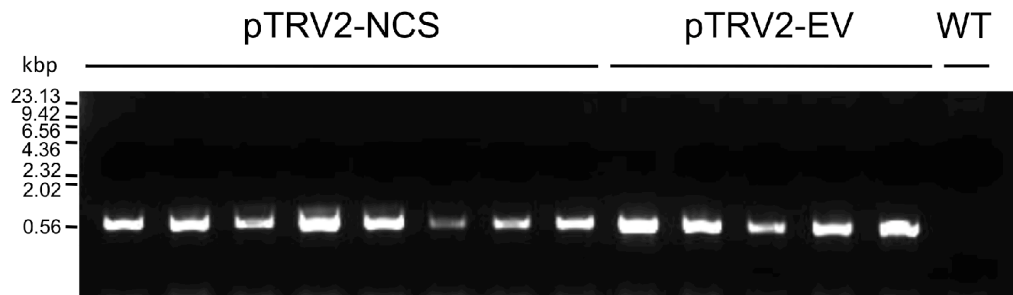

**Supplemental Figure 1. Detection of tobacco rattle virus (TRV).**

Gene transcripts encoding TRV coat protein (613 bp) in plants infiltrated with pTRV1 and either pTRV2-NCS or pTRV2-EV. Wild type (WT) plants were not infiltrated. Abbreviation: kbp, kilobase pairs.

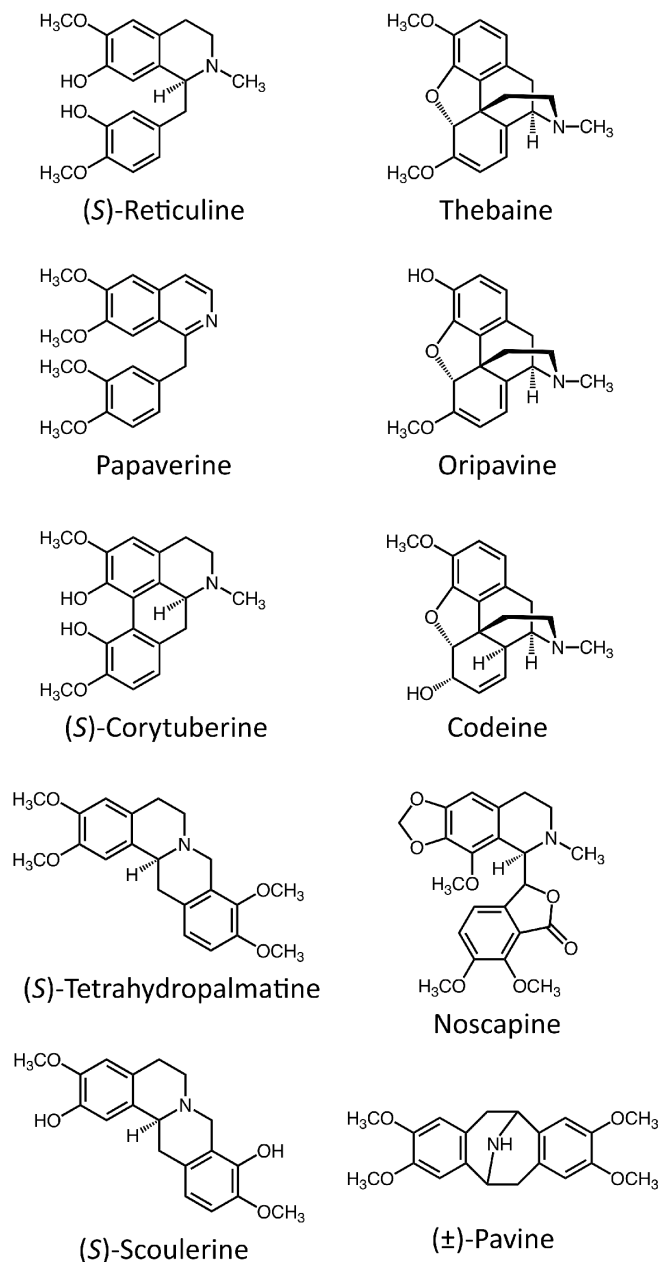

**Supplemental Figure 2. Benzylisoquinoline alkaloids tested as possible substrates for recombinant *Coptis japonica* NCS1 (Cj NCS1).**

Each substrate was incubated with purified recombinant Cj NCS1 and the release of methyl ether (-CH<sub>3</sub>) or the introduction of a hydroxyl group (-OH) was monitored by LC-MS/MS analysis.
